# Supplementary material
Source: Royal Society of Chemistry journal article supplement (doi:10.1039/d6cp00590j)
Supplement: d6cp00590j1.pdf [file d6cp00590j1.pdf]

**Potential Energy Curves of TiV at the MRCI/cc-pVQZ level. (Distances in Å and Energies in  $E_h$ ).**

| $X^4\Sigma^-$ |              | $1^2\Delta$ |              | $2^2\Gamma$ |              | $3^2\Sigma^+$ |              |
|---------------|--------------|-------------|--------------|-------------|--------------|---------------|--------------|
| 1.55          | -1791.389935 | 1.60        | -1791.396060 | 1.60        | -1791.406289 | 1.60          | -1791.405255 |
| 1.60          | -1791.419030 | 1.65        | -1791.420997 | 1.65        | -1791.425594 | 1.65          | -1791.424578 |
| 1.65          | -1791.439383 | 1.70        | -1791.438438 | 1.70        | -1791.438245 | 1.70          | -1791.437229 |
| 1.70          | -1791.452610 | 1.75        | -1791.450158 | 1.75        | -1791.446087 | 1.75          | -1791.445065 |
| 1.75          | -1791.460420 | 1.80        | -1791.457545 | 1.80        | -1791.450553 | 1.80          | -1791.449535 |
| 1.80          | -1791.465335 | 1.85        | -1791.462308 | 1.85        | -1791.451995 | 1.85          | -1791.451027 |
| 1.85          | -1791.467730 | 1.90        | -1791.463974 | 1.90        | -1791.452527 | 1.90          | -1791.451581 |
| 1.90          | -1791.468292 | 1.95        | -1791.463800 | 1.95        | -1791.452073 | 1.95          | -1791.451161 |
| 1.95          | -1791.467696 | 2.00        | -1791.462391 | 2.00        | -1791.451581 | 2.00          | -1791.450743 |
| 2.00          | -1791.466160 | 2.05        | -1791.459892 | 2.05        | -1791.450492 | 2.05          | -1791.449693 |
| 2.05          | -1791.463728 | 2.10        | -1791.456679 | 2.10        | -1791.448614 | 2.10          | -1791.447846 |
| 2.10          | -1791.461082 | 2.15        | -1791.452981 | 2.15        | -1791.446571 | 2.15          | -1791.445822 |
| 2.15          | -1791.458693 | 2.20        | -1791.448951 | 2.20        | -1791.444413 | 2.20          | -1791.443681 |
| 2.20          | -1791.455393 | 2.30        | -1791.440448 | 2.30        | -1791.440133 | 2.30          | -1791.439419 |
| 2.25          | -1791.451969 | 2.35        | -1791.437220 | 2.35        | -1791.437649 | 2.35          | -1791.436934 |
| 2.30          | -1791.448263 | 2.40        | -1791.436754 | 2.40        | -1791.426811 | 2.40          | -1791.425411 |
| 2.35          | -1791.442443 | 2.50        | -1791.435779 | 2.50        | -1791.430171 | 2.50          | -1791.429235 |
| 2.37          | -1791.440970 | 2.60        | -1791.434699 | 2.60        | -1791.431864 | 2.60          | -1791.431158 |
| 2.40          | -1791.429857 | 2.70        | -1791.433356 | 2.70        | -1791.432156 | 2.70          | -1791.431559 |
| 2.45          | -1791.431823 | 2.80        | -1791.431615 | 2.80        | -1791.431279 | 2.80          | -1791.430736 |
| 2.50          | -1791.433379 | 2.90        | -1791.429418 | 2.90        | -1791.429381 | 2.90          | -1791.428860 |
| 2.55          | -1791.434563 | 2.95        | -1791.426327 | 2.95        | -1791.426112 | 2.95          | -1791.425544 |
| 2.60          | -1791.435408 | 3.00        | -1791.422412 | 3.00        | -1791.420797 | 3.00          | -1791.420151 |
| 2.65          | -1791.435946 | 3.10        | -1791.424246 | 3.10        | -1791.422454 | 3.10          | -1791.421990 |
| 2.70          | -1791.436211 | 3.20        | -1791.425571 | 3.20        | -1791.424098 | 3.20          | -1791.423658 |
| 2.75          | -1791.436224 | 3.30        | -1791.426370 | 3.30        | -1791.425177 | 3.30          | -1791.424748 |
| 2.80          | -1791.436014 | 3.40        | -1791.426705 | 3.40        | -1791.425755 | 3.40          | -1791.425332 |
| 2.85          | -1791.435537 | 3.50        | -1791.426668 | 3.50        | -1791.425804 | 3.50          | -1791.425386 |
| 2.90          | -1791.434962 | 3.60        | -1791.426435 | 3.60        | -1791.425651 | 3.60          | -1791.425404 |
| 2.95          | -1791.434245 | 3.70        | -1791.426100 | 3.70        | -1791.425450 | 3.70          | -1791.425197 |
| 3.00          | -1791.433409 | 3.80        | -1791.425717 | 3.80        | -1791.425249 | 3.80          | -1791.424846 |
| 3.05          | -1791.432468 | 4.00        | -1791.424484 | 4.00        | -1791.424549 | 4.00          | -1791.424289 |
| 3.10          | -1791.431427 | 4.30        | -1791.423030 | 4.30        | -1791.423365 | 4.30          | -1791.423052 |
| 3.15          | -1791.430253 | 4.50        | -1791.422564 | 4.50        | -1791.422891 | 4.50          | -1791.422569 |
| 3.25          | -1791.428227 | 5.00        | -1791.421706 | 5.00        | -1791.422034 | 5.00          | -1791.421712 |
| 3.30          | -1791.427519 | 5.50        | -1791.421192 | 5.50        | -1791.421511 | 5.50          | -1791.421189 |
| 3.35          | -1791.426815 | 6.00        | -1791.420888 | 6.00        | -1791.421186 | 6.00          | -1791.420862 |
| 3.40          | -1791.426109 | 7.00        | -1791.420553 | 7.00        | -1791.420855 | 7.00          | -1791.420529 |
| 3.50          | -1791.425985 | 8.00        | -1791.420424 | 8.00        | -1791.420727 | 8.00          | -1791.420398 |
| 3.55          | -1791.425989 | 10.00       | -1791.420334 | 10.00       | -1791.420330 | 10.00         | -1791.420334 |
| 3.60          | -1791.425952 |             |              |             |              |               |              |
| 3.70          | -1791.425790 |             |              |             |              |               |              |
| 3.80          | -1791.425553 |             |              |             |              |               |              |
| 3.90          | -1791.425279 |             |              |             |              |               |              |
| 4.00          | -1791.424990 |             |              |             |              |               |              |
| 4.20          | -1791.424428 |             |              |             |              |               |              |
| 4.40          | -1791.423932 |             |              |             |              |               |              |
| 4.60          | -1791.423515 |             |              |             |              |               |              |
| 4.80          | -1791.423171 |             |              |             |              |               |              |
| 5.00          | -1791.422937 |             |              |             |              |               |              |
| 5.50          | -1791.422425 |             |              |             |              |               |              |
| 6.00          | -1791.422102 |             |              |             |              |               |              |
| 6.50          | -1791.421854 |             |              |             |              |               |              |
| 7.00          | -1791.421728 |             |              |             |              |               |              |
| 8.00          | -1791.421600 |             |              |             |              |               |              |
| 10.00         | -1791.421537 |             |              |             |              |               |              |

| $4^4\Pi$ |              | $5^2\Sigma^-$ |              | $6^8\Delta$ |              | $7^4\Delta$ |              |
|----------|--------------|---------------|--------------|-------------|--------------|-------------|--------------|
| 1.65     | -1791.396112 | 1.60          | -1791.407402 | 2.00        | -1791.396500 | 1.65        | -1791.398246 |
| 1.70     | -1791.415108 | 1.65          | -1791.425464 | 2.10        | -1791.413190 | 1.70        | -1791.414936 |
| 1.75     | -1791.428697 | 1.70          | -1791.436741 | 2.15        | -1791.420800 | 1.75        | -1791.426046 |
| 1.80     | -1791.438154 | 1.75          | -1791.443125 | 2.20        | -1791.426800 | 1.80        | -1791.433158 |
| 1.85     | -1791.443957 | 1.80          | -1791.446056 | 2.25        | -1791.431810 | 1.85        | -1791.437540 |
| 1.90     | -1791.447664 | 1.85          | -1791.446320 | 2.30        | -1791.435900 | 1.90        | -1791.440182 |
| 1.98     | -1791.449895 | 1.90          | -1791.445479 | 2.35        | -1791.439160 | 2.00        | -1791.442883 |
| 2.00     | -1791.449970 | 1.95          | -1791.443781 | 2.40        | -1791.441720 | 2.10        | -1791.444182 |
| 2.05     | -1791.449393 | 2.00          | -1791.442389 | 2.45        | -1791.443520 | 2.20        | -1791.444330 |
| 2.10     | -1791.448120 | 2.05          | -1791.440608 | 2.50        | -1791.444770 | 2.30        | -1791.443368 |
| 2.15     | -1791.446340 | 2.10          | -1791.439252 | 2.55        | -1791.445550 | 2.35        | -1791.442287 |
| 2.20     | -1791.442254 | 2.15          | -1791.438320 | 2.60        | -1791.445890 | 2.40        | -1791.440299 |
| 2.23     | -1791.432350 | 2.20          | -1791.437481 | 2.65        | -1791.445880 | 2.45        | -1791.431823 |
| 2.25     | -1791.432860 | 2.30          | -1791.436182 | 2.70        | -1791.445470 | 2.50        | -1791.433379 |
| 2.30     | -1791.433700 | 2.35          | -1791.434076 | 2.75        | -1791.444880 | 2.55        | -1791.434563 |
| 2.35     | -1791.434627 | 2.40          | -1791.426762 | 2.80        | -1791.444060 | 2.60        | -1791.435408 |
| 2.40     | -1791.435292 | 2.50          | -1791.430010 | 2.90        | -1791.441840 | 2.65        | -1791.435946 |
| 2.45     | -1791.435695 | 2.60          | -1791.431625 | 3.00        | -1791.439040 | 2.70        | -1791.436211 |
| 2.50     | -1791.436260 | 2.70          | -1791.431866 | 3.10        | -1791.435990 | 2.75        | -1791.435949 |
| 2.55     | -1791.436886 | 2.80          | -1791.430873 | 3.20        | -1791.433060 | 2.80        | -1791.435133 |
| 2.60     | -1791.437402 | 2.90          | -1791.428948 | 3.30        | -1791.429680 | 2.85        | -1791.434234 |
| 2.70     | -1791.437756 | 2.95          | -1791.425613 | 3.35        | -1791.428710 | 2.90        | -1791.433257 |
| 2.75     | -1791.437606 | 3.00          | -1791.420197 | 3.40        | -1791.427780 | 2.95        | -1791.432211 |
| 2.80     | -1791.437266 | 3.10          | -1791.422008 | 3.50        | -1791.426040 | 3.00        | -1791.431106 |
| 2.85     | -1791.436755 | 3.20          | -1791.423666 | 3.60        | -1791.424460 | 3.05        | -1791.429949 |
| 2.91     | -1791.435942 | 3.30          | -1791.424752 | 3.80        | -1791.421760 | 3.10        | -1791.428741 |
| 2.95     | -1791.435296 | 3.40          | -1791.425425 | 4.00        | -1791.419620 | 3.15        | -1791.427454 |
| 3.00     | -1791.434387 | 3.50          | -1791.425388 | 4.20        | -1791.417950 | 3.20        | -1791.425757 |
| 3.06     | -1791.433189 | 3.60          | -1791.425404 | 4.40        | -1791.416690 | 3.25        | -1791.425277 |
| 3.10     | -1791.432294 | 3.70          | -1791.425197 | 4.60        | -1791.415740 | 3.30        | -1791.425668 |
| 3.13     | -1791.431727 | 3.80          | -1791.424848 | 4.80        | -1791.415020 | 3.35        | -1791.425935 |
| 3.15     | -1791.431100 | 4.00          | -1791.424191 | 4.90        | -1791.414740 | 3.40        | -1791.426096 |
| 3.18     | -1791.430385 | 4.30          | -1791.423054 | 5.00        | -1791.414490 | 3.50        | -1791.426182 |
| 3.19     | -1791.429220 | 4.50          | -1791.422573 | 5.50        | -1791.413670 | 3.55        | -1791.426140 |
| 3.20     | -1791.428300 | 5.00          | -1791.421506 | 6.00        | -1791.413250 | 3.60        | -1791.426059 |
| 3.22     | -1791.427870 | 5.50          | -1791.421104 | 7.00        | -1791.412880 | 3.70        | -1791.425814 |
| 3.25     | -1791.427465 | 6.00          | -1791.420864 | 7.50        | -1791.412800 | 3.80        | -1791.425502 |
| 3.30     | -1791.426787 | 7.00          | -1791.420527 | 8.00        | -1791.412750 | 3.90        | -1791.425160 |
| 3.40     | -1791.427018 | 8.00          | -1791.420398 | 10.00       | -1791.412670 | 4.00        | -1791.424811 |
| 3.50     | -1791.427148 | 10.00         | -1791.420333 |             |              | 4.20        | -1791.424399 |
| 3.60     | -1791.426958 |               |              |             |              | 4.40        | -1791.423828 |
| 3.70     | -1791.426651 |               |              |             |              | 4.60        | -1791.423357 |
| 3.80     | -1791.426283 |               |              |             |              | 4.80        | -1791.422977 |
| 4.00     | -1791.425496 |               |              |             |              | 5.00        | -1791.422670 |
| 4.20     | -1791.424760 |               |              |             |              | 5.50        | -1791.422132 |
| 4.40     | -1791.424134 |               |              |             |              | 6.00        | -1791.421806 |
| 4.60     | -1791.423625 |               |              |             |              | 6.50        | -1791.421606 |
| 4.80     | -1791.423218 |               |              |             |              | 7.00        | -1791.421482 |
| 5.00     | -1791.422893 |               |              |             |              | 8.00        | -1791.421359 |
| 5.20     | -1791.422632 |               |              |             |              | 10.00       | -1791.421287 |
| 5.50     | -1791.422332 |               |              |             |              |             |              |
| 6.00     | -1791.421995 |               |              |             |              |             |              |
| 6.50     | -1791.421788 |               |              |             |              |             |              |
| 7.00     | -1791.421660 |               |              |             |              |             |              |
| 7.50     | -1791.421578 |               |              |             |              |             |              |
| 8.00     | -1791.421527 |               |              |             |              |             |              |
| 10.00    | -1791.421449 |               |              |             |              |             |              |

| <b>8<sup>8</sup>H</b> |              | <b>9<sup>6</sup>Π</b> |              | <b>10<sup>6</sup>H</b> |              | <b>11<sup>8</sup>Π</b> |              |
|-----------------------|--------------|-----------------------|--------------|------------------------|--------------|------------------------|--------------|
| 2.10                  | -1791.375160 | 1.85                  | -1791.415701 | 1.85                   | -1791.372453 | 2.10                   | -1791.393612 |
| 2.20                  | -1791.397349 | 1.90                  | -1791.419954 | 1.90                   | -1791.383225 | 2.20                   | -1791.405610 |
| 2.30                  | -1791.413790 | 1.95                  | -1791.423427 | 1.95                   | -1791.392332 | 2.30                   | -1791.417920 |
| 2.40                  | -1791.425743 | 2.00                  | -1791.426626 | 2.00                   | -1791.400250 | 2.40                   | -1791.427100 |
| 2.45                  | -1791.430226 | 2.05                  | -1791.429595 | 2.05                   | -1791.407194 | 2.45                   | -1791.430730 |
| 2.50                  | -1791.433727 | 2.10                  | -1791.432227 | 2.10                   | -1791.413277 | 2.50                   | -1791.433500 |
| 2.55                  | -1791.436173 | 2.15                  | -1791.434451 | 2.15                   | -1791.418575 | 2.55                   | -1791.435390 |
| 2.60                  | -1791.438049 | 2.20                  | -1791.436239 | 2.20                   | -1791.423196 | 2.60                   | -1791.436960 |
| 2.65                  | -1791.439534 | 2.25                  | -1791.437603 | 2.25                   | -1791.427082 | 2.65                   | -1791.438270 |
| 2.70                  | -1791.440518 | 2.30                  | -1791.438597 | 2.30                   | -1791.430354 | 2.70                   | -1791.439180 |
| 2.75                  | -1791.441069 | 2.35                  | -1791.439295 | 2.35                   | -1791.433071 | 2.75                   | -1791.439720 |
| 2.80                  | -1791.441244 | 2.40                  | -1791.439783 | 2.40                   | -1791.435297 | 2.80                   | -1791.439940 |
| 2.85                  | -1791.441095 | 2.45                  | -1791.440138 | 2.45                   | -1791.437085 | 2.85                   | -1791.439860 |
| 2.90                  | -1791.440665 | 2.50                  | -1791.440415 | 2.50                   | -1791.438481 | 2.90                   | -1791.439520 |
| 2.95                  | -1791.439998 | 2.55                  | -1791.440635 | 2.55                   | -1791.439522 | 2.95                   | -1791.438950 |
| 3.00                  | -1791.439134 | 2.60                  | -1791.440780 | 2.60                   | -1791.440235 | 3.00                   | -1791.438180 |
| 3.10                  | -1791.436935 | 2.65                  | -1791.440818 | 2.65                   | -1791.440651 | 3.10                   | -1791.436170 |
| 3.20                  | -1791.434344 | 2.70                  | -1791.440718 | 2.70                   | -1791.440797 | 3.20                   | -1791.433740 |
| 3.30                  | -1791.430735 | 2.75                  | -1791.440464 | 2.75                   | -1791.440698 | 3.30                   | -1791.430360 |
| 3.40                  | -1791.428928 | 2.80                  | -1791.440051 | 2.80                   | -1791.440377 | 3.40                   | -1791.428600 |
| 3.50                  | -1791.427190 | 2.85                  | -1791.439483 | 2.85                   | -1791.439860 | 3.50                   | -1791.426890 |
| 3.60                  | -1791.425555 | 2.90                  | -1791.438773 | 2.90                   | -1791.439170 | 3.60                   | -1791.425280 |
| 3.80                  | -1791.422672 | 2.95                  | -1791.437936 | 2.95                   | -1791.438336 | 3.80                   | -1791.422430 |
| 4.00                  | -1791.420343 | 3.00                  | -1791.436993 | 3.00                   | -1791.437382 | 4.00                   | -1791.420130 |
| 4.20                  | -1791.418533 | 3.05                  | -1791.435969 | 3.05                   | -1791.436337 | 4.20                   | -1791.418350 |
| 4.40                  | -1791.417158 | 3.10                  | -1791.434883 | 3.10                   | -1791.435225 | 4.40                   | -1791.416990 |
| 4.60                  | -1791.416126 | 3.15                  | -1791.433757 | 3.15                   | -1791.434071 | 4.60                   | -1791.415980 |
| 4.80                  | -1791.415354 | 3.20                  | -1791.432617 | 3.20                   | -1791.432899 | 4.80                   | -1791.415220 |
| 5.00                  | -1791.414775 | 3.25                  | -1791.431486 | 3.25                   | -1791.431734 | 5.00                   | -1791.414650 |
| 5.50                  | -1791.413804 | 3.30                  | -1791.430385 | 3.30                   | -1791.430601 | 5.50                   | -1791.413828 |
| 6.00                  | -1791.413341 | 3.35                  | -1791.429325 | 3.35                   | -1791.429507 | 6.00                   | -1791.413354 |
| 7.00                  | -1791.412946 | 3.40                  | -1791.428284 | 3.40                   | -1791.428435 | 7.00                   | -1791.412950 |
| 8.00                  | -1791.412810 | 3.45                  | -1791.427235 | 3.45                   | -1791.427358 | 8.00                   | -1791.412811 |
| 10.0                  | -1791.412733 | 3.50                  | -1791.425801 | 3.50                   | -1791.426266 | 10.00                  | -1791.412730 |
|                       |              | 3.55                  | -1791.425819 | 3.55                   | -1791.425836 |                        |              |
|                       |              | 3.60                  | -1791.425791 | 3.60                   | -1791.425801 |                        |              |
|                       |              | 3.65                  | -1791.425725 | 3.65                   | -1791.425731 |                        |              |
|                       |              | 3.70                  | -1791.425630 | 3.70                   | -1791.425632 |                        |              |
|                       |              | 3.75                  | -1791.425514 | 3.75                   | -1791.425510 |                        |              |
|                       |              | 3.80                  | -1791.425380 | 3.80                   | -1791.425372 |                        |              |
|                       |              | 3.90                  | -1791.425078 | 3.90                   | -1791.425065 |                        |              |
|                       |              | 4.00                  | -1791.424755 | 4.00                   | -1791.424737 |                        |              |
|                       |              | 4.10                  | -1791.424431 | 4.10                   | -1791.424409 |                        |              |
|                       |              | 4.20                  | -1791.424112 | 4.20                   | -1791.424085 |                        |              |
|                       |              | 4.40                  | -1791.423504 | 4.40                   | -1791.423479 |                        |              |
|                       |              | 4.50                  | -1791.423249 | 4.50                   | -1791.423223 |                        |              |
|                       |              | 4.70                  | -1791.422759 | 4.70                   | -1791.422621 |                        |              |
|                       |              | 5.00                  | -1791.422393 | 5.00                   | -1791.422322 |                        |              |
|                       |              | 5.50                  | -1791.421953 | 5.50                   | -1791.421952 |                        |              |
|                       |              | 6.00                  | -1791.421661 | 6.00                   | -1791.421661 |                        |              |
|                       |              | 7.00                  | -1791.421347 | 7.00                   | -1791.421347 |                        |              |
|                       |              | 8.00                  | -1791.421222 | 8.00                   | -1791.421222 |                        |              |
|                       |              | 10.00                 | -1791.421222 | 10.00                  | -1791.421222 |                        |              |

| $12^2\Pi$ |              | $13^2H$ |              | $14^6\Pi$ |              | $15^6\Sigma^+$ |              |
|-----------|--------------|---------|--------------|-----------|--------------|----------------|--------------|
| 1.70      | -1791.397902 | 1.70    | -1791.397009 | 1.85      | -1791.373257 | 2.10           | -1791.425267 |
| 1.75      | -1791.412385 | 1.75    | -1791.411439 | 1.90      | -1791.384049 | 2.15           | -1791.429010 |
| 1.80      | -1791.422686 | 1.80    | -1791.421712 | 1.95      | -1791.393148 | 2.20           | -1791.431818 |
| 1.85      | -1791.429805 | 1.85    | -1791.428843 | 2.00      | -1791.401024 | 2.25           | -1791.434062 |
| 1.90      | -1791.434511 | 1.90    | -1791.433601 | 2.05      | -1791.407887 | 2.30           | -1791.435542 |
| 1.95      | -1791.437394 | 1.95    | -1791.436579 | 2.10      | -1791.413854 | 2.35           | -1791.436152 |
| 2.00      | -1791.438913 | 2.00    | -1791.438228 | 2.15      | -1791.419001 | 2.40           | -1791.436895 |
| 2.05      | -1791.439420 | 2.05    | -1791.438910 | 2.20      | -1791.423382 | 2.45           | -1791.437446 |
| 2.10      | -1791.439029 | 2.10    | -1791.438770 | 2.25      | -1791.427048 | 2.50           | -1791.437761 |
| 2.15      | -1791.438320 | 2.15    | -1791.438174 | 2.30      | -1791.430062 | 2.55           | -1791.437987 |
| 2.20      | -1791.437349 | 2.20    | -1791.437247 | 2.35      | -1791.432498 | 2.60           | -1791.438163 |
| 2.25      | -1791.436207 | 2.25    | -1791.436075 | 2.40      | -1791.434422 | 2.65           | -1791.438200 |
| 2.30      | -1791.434357 | 2.30    | -1791.434227 | 2.45      | -1791.435897 | 2.70           | -1791.438170 |
| 2.35      | -1791.433397 | 2.35    | -1791.433102 | 2.50      | -1791.436973 | 2.75           | -1791.437983 |
| 2.40      | -1791.432965 | 2.40    | -1791.432683 | 2.55      | -1791.437705 | 2.80           | -1791.437558 |
| 2.45      | -1791.433581 | 2.45    | -1791.433350 | 2.60      | -1791.438144 | 2.85           | -1791.437008 |
| 2.50      | -1791.434043 | 2.50    | -1791.433875 | 2.65      | -1791.438333 | 2.90           | -1791.436446 |
| 2.55      | -1791.434020 | 2.55    | -1791.433978 | 2.70      | -1791.438302 | 2.95           | -1791.435741 |
| 2.60      | -1791.434563 | 2.60    | -1791.434429 | 2.75      | -1791.438068 | 3.00           | -1791.434881 |
| 2.70      | -1791.434738 | 2.70    | -1791.434592 | 2.80      | -1791.437653 | 3.05           | -1791.433901 |
| 2.75      | -1791.434514 | 2.75    | -1791.434355 | 2.85      | -1791.437073 | 3.10           | -1791.432994 |
| 2.80      | -1791.434115 | 2.80    | -1791.433947 | 2.90      | -1791.436351 | 3.15           | -1791.431669 |
| 2.85      | -1791.433560 | 2.85    | -1791.433386 | 2.95      | -1791.435509 | 3.20           | -1791.430074 |
| 2.90      | -1791.432872 | 2.90    | -1791.432695 | 3.00      | -1791.434569 | 3.25           | -1791.425141 |
| 2.95      | -1791.432067 | 2.95    | -1791.431893 | 3.05      | -1791.433557 | 3.30           | -1791.425406 |
| 3.00      | -1791.431166 | 3.00    | -1791.430996 | 3.10      | -1791.432497 | 3.35           | -1791.425600 |
| 3.05      | -1791.430175 | 3.05    | -1791.430011 | 3.15      | -1791.431407 | 3.40           | -1791.425732 |
| 3.07      | -1791.429738 | 3.07    | -1791.429578 | 3.20      | -1791.430319 | 3.45           | -1791.425809 |
| 3.09      | -1791.429218 | 3.09    | -1791.429058 | 3.25      | -1791.429256 | 3.50           | -1791.425842 |
| 3.20      | -1791.424078 | 3.20    | -1791.423967 | 3.30      | -1791.428243 | 3.55           | -1791.425838 |
| 3.30      | -1791.424497 | 3.30    | -1791.424429 | 3.35      | -1791.427290 | 3.60           | -1791.425803 |
| 3.40      | -1791.424687 | 3.40    | -1791.424644 | 3.40      | -1791.426373 | 3.70           | -1791.425664 |
| 3.50      | -1791.424724 | 3.50    | -1791.424697 | 3.45      | -1791.425450 | 3.80           | -1791.425464 |
| 3.60      | -1791.424757 | 3.60    | -1791.424757 | 3.50      | -1791.425233 | 4.00           | -1791.424952 |
| 3.70      | -1791.424651 | 3.70    | -1791.424651 | 3.55      | -1791.425275 | 4.10           | -1791.424683 |
| 3.80      | -1791.424460 | 3.80    | -1791.424460 | 3.60      | -1791.425273 | 4.20           | -1791.424423 |
| 4.00      | -1791.424116 | 4.00    | -1791.424114 | 3.65      | -1791.425235 | 4.30           | -1791.424117 |
| 4.20      | -1791.423844 | 4.20    | -1791.423843 | 3.70      | -1791.425169 | 4.50           | -1791.423669 |
| 4.40      | -1791.423530 | 4.40    | -1791.423521 | 3.75      | -1791.425081 | 4.70           | -1791.423307 |
| 4.70      | -1791.423127 | 4.70    | -1791.423126 | 3.80      | -1791.424976 | 4.80           | -1791.423150 |
| 5.00      | -1791.422785 | 5.00    | -1791.422784 | 3.90      | -1791.424730 | 5.00           | -1791.422876 |
| 5.50      | -1791.422355 | 5.50    | -1791.422354 | 4.00      | -1791.424458 | 5.50           | -1791.422418 |
| 6.00      | -1791.422064 | 6.00    | -1791.422063 | 4.10      | -1791.424175 | 6.00           | -1791.422098 |
| 6.50      | -1791.421873 | 6.50    | -1791.421872 | 4.20      | -1791.423882 | 6.50           | -1791.421896 |
| 7.00      | -1791.421751 | 7.00    | -1791.421750 | 4.40      | -1791.423319 | 7.00           | -1791.421727 |
| 8.00      | -1791.421623 | 8.00    | -1791.421623 | 4.50      | -1791.423012 | 8.00           | -1791.421600 |
| 10.00     | -1791.421545 | 10.00   | -1791.421544 | 4.70      | -1791.422626 | 10.00          | -1791.421538 |
|           |              |         |              | 5.00      | -1791.422323 |                |              |
|           |              |         |              | 5.50      | -1791.421905 |                |              |
|           |              |         |              | 6.00      | -1791.421606 |                |              |
|           |              |         |              | 7.00      | -1791.421285 |                |              |
|           |              |         |              | 8.00      | -1791.421157 |                |              |
|           |              |         |              | 10.00     | -1791.421157 |                |              |

| $16^8\Sigma^+$ |              | $17^6\Phi$ |              | $18^4H$ |              | $19^6\Sigma^-$ |              |
|----------------|--------------|------------|--------------|---------|--------------|----------------|--------------|
| 2.00           | -1791.357952 | 1.85       | -1791.373638 | 1.90    | -1791.399040 | 2.10           | -1791.419651 |
| 2.10           | -1791.383794 | 1.90       | -1791.384317 | 1.95    | -1791.402767 | 2.15           | -1791.417611 |
| 2.15           | -1791.394136 | 1.95       | -1791.393346 | 1.98    | -1791.404859 | 2.20           | -1791.417029 |
| 2.20           | -1791.402586 | 2.00       | -1791.401144 | 2.00    | -1791.406631 | 2.25           | -1791.421815 |
| 2.25           | -1791.409798 | 2.05       | -1791.407913 | 2.05    | -1791.410281 | 2.30           | -1791.425758 |
| 2.30           | -1791.416088 | 2.10       | -1791.413764 | 2.10    | -1791.414326 | 2.35           | -1791.428854 |
| 2.35           | -1791.421237 | 2.15       | -1791.418789 | 2.15    | -1791.418400 | 2.40           | -1791.431358 |
| 2.40           | -1791.425486 | 2.20       | -1791.422983 | 2.20    | -1791.422271 | 2.45           | -1791.433344 |
| 2.45           | -1791.428926 | 2.25       | -1791.426505 | 2.23    | -1791.423932 | 2.50           | -1791.434884 |
| 2.50           | -1791.431733 | 2.30       | -1791.429368 | 2.25    | -1791.425490 | 2.55           | -1791.435887 |
| 2.55           | -1791.433941 | 2.35       | -1791.431663 | 2.30    | -1791.428302 | 2.60           | -1791.436676 |
| 2.60           | -1791.435598 | 2.40       | -1791.433475 | 2.35    | -1791.430702 | 2.65           | -1791.437148 |
| 2.65           | -1791.436770 | 2.45       | -1791.434886 | 2.40    | -1791.432703 | 2.70           | -1791.437483 |
| 2.70           | -1791.437306 | 2.50       | -1791.435963 | 2.45    | -1791.434322 | 2.75           | -1791.437428 |
| 2.75           | -1791.437689 | 2.55       | -1791.436761 | 2.50    | -1791.435573 | 2.80           | -1791.437155 |
| 2.80           | -1791.437751 | 2.60       | -1791.437315 | 2.55    | -1791.436514 | 2.85           | -1791.436713 |
| 2.90           | -1791.437086 | 2.65       | -1791.437630 | 2.60    | -1791.437138 | 2.90           | -1791.436229 |
| 3.00           | -1791.435610 | 2.70       | -1791.437710 | 2.70    | -1791.437574 | 2.95           | -1791.435577 |
| 3.10           | -1791.433598 | 2.75       | -1791.437571 | 2.75    | -1791.437448 | 3.00           | -1791.434773 |
| 3.20           | -1791.431363 | 2.80       | -1791.437230 | 2.80    | -1791.437127 | 3.05           | -1791.433824 |
| 3.30           | -1791.427690 | 2.85       | -1791.436704 | 2.85    | -1791.436633 | 3.10           | -1791.432914 |
| 3.35           | -1791.426899 | 2.90       | -1791.436026 | 2.91    | -1791.435837 | 3.15           | -1791.431629 |
| 3.40           | -1791.426124 | 2.95       | -1791.435220 | 2.95    | -1791.435202 | 3.20           | -1791.430045 |
| 3.50           | -1791.424640 | 3.00       | -1791.434313 | 3.00    | -1791.434305 | 3.25           | -1791.424863 |
| 3.60           | -1791.423263 | 3.05       | -1791.433329 | 3.06    | -1791.433127 | 3.30           | -1791.425171 |
| 3.80           | -1791.420875 | 3.10       | -1791.432292 | 3.10    | -1791.432237 | 3.35           | -1791.425397 |
| 4.00           | -1791.418962 | 3.15       | -1791.431228 | 3.13    | -1791.431681 | 3.40           | -1791.425552 |
| 4.20           | -1791.417478 | 3.20       | -1791.430162 | 3.15    | -1791.431060 | 3.45           | -1791.425648 |
| 4.40           | -1791.416351 | 3.25       | -1791.429122 | 3.18    | -1791.430355 | 3.50           | -1791.425695 |
| 4.60           | -1791.415526 | 3.30       | -1791.428130 | 3.19    | -1791.429961 | 3.55           | -1791.425700 |
| 4.80           | -1791.414901 | 3.35       | -1791.427199 | 3.19    | -1791.429220 | 3.60           | -1791.425672 |
| 4.90           | -1791.414646 | 3.40       | -1791.426300 | 3.20    | -1791.428048 | 3.70           | -1791.425540 |
| 5.00           | -1791.414423 | 3.45       | -1791.425393 | 3.22    | -1791.427782 | 3.80           | -1791.425339 |
| 5.50           | -1791.413653 | 3.50       | -1791.425208 | 3.25    | -1791.427382 | 4.00           | -1791.424842 |
| 6.00           | -1791.413239 | 3.55       | -1791.425254 | 3.30    | -1791.426710 | 4.10           | -1791.424583 |
| 7.00           | -1791.412869 | 3.60       | -1791.425255 | 3.40    | -1791.427119 | 4.20           | -1791.424331 |
| 7.50           | -1791.412789 | 3.65       | -1791.425220 | 3.50    | -1791.427060 | 4.30           | -1791.424092 |
| 8.00           | -1791.412740 | 3.70       | -1791.425157 | 3.60    | -1791.426880 | 4.50           | -1791.423667 |
| 10.00          | -1791.412670 | 3.75       | -1791.425070 | 3.70    | -1791.426579 | 4.70           | -1791.423306 |
|                |              | 3.80       | -1791.424966 | 3.80    | -1791.426215 | 4.80           | -1791.423149 |
|                |              | 3.90       | -1791.424721 | 4.00    | -1791.425432 | 5.00           | -1791.422875 |
|                |              | 4.00       | -1791.424448 | 4.20    | -1791.424697 | 5.50           | -1791.422423 |
|                |              | 4.10       | -1791.424161 | 4.40    | -1791.424072 | 6.00           | -1791.422057 |
|                |              | 4.20       | -1791.423847 | 4.60    | -1791.423562 | 6.50           | -1791.421899 |
|                |              | 4.40       | -1791.423319 | 4.80    | -1791.423154 | 7.00           | -1791.421729 |
|                |              | 4.50       | -1791.423012 | 5.00    | -1791.422828 | 8.00           | -1791.421601 |
|                |              | 4.70       | -1791.422761 | 5.20    | -1791.422566 | 10.00          | -1791.421538 |
|                |              | 5.00       | -1791.422394 | 5.50    | -1791.422264 |                |              |
|                |              | 5.50       | -1791.421903 | 6.00    | -1791.421925 |                |              |
|                |              | 6.00       | -1791.421606 | 6.50    | -1791.421717 |                |              |
|                |              | 7.00       | -1791.421283 | 7.00    | -1791.421588 |                |              |
|                |              | 8.00       | -1791.421158 | 7.50    | -1791.421507 |                |              |
|                |              | 10.00      | -1791.421158 | 8.00    | -1791.421455 |                |              |
|                |              |            |              | 10.00   | -1791.421377 |                |              |

| $20^2\Delta$ |              | $21^6\Gamma$ |              | $22^8\Pi$ |              | $23^8\Gamma$ |              |
|--------------|--------------|--------------|--------------|-----------|--------------|--------------|--------------|
| 1.60         | -1791.364078 | 2.10         | -1791.421919 | 2.10      | -1791.387615 | 2.00         | -1791.346738 |
| 1.65         | -1791.387751 | 2.15         | -1791.425200 | 2.20      | -1791.399790 | 2.10         | -1791.365456 |
| 1.70         | -1791.403865 | 2.20         | -1791.427665 | 2.30      | -1791.409303 | 2.15         | -1791.378224 |
| 1.75         | -1791.414394 | 2.25         | -1791.429411 | 2.40      | -1791.420680 | 2.20         | -1791.389298 |
| 1.80         | -1791.420967 | 2.30         | -1791.430692 | 2.45      | -1791.425350 | 2.25         | -1791.398796 |
| 1.85         | -1791.425911 | 2.35         | -1791.428246 | 2.50      | -1791.428890 | 2.30         | -1791.407070 |
| 1.90         | -1791.428972 | 2.40         | -1791.430752 | 2.55      | -1791.431480 | 2.35         | -1791.413883 |
| 1.95         | -1791.431745 | 2.45         | -1791.432754 | 2.60      | -1791.433500 | 2.40         | -1791.419540 |
| 2.00         | -1791.433301 | 2.50         | -1791.434316 | 2.65      | -1791.435030 | 2.45         | -1791.424177 |
| 2.05         | -1791.435177 | 2.55         | -1791.435451 | 2.70      | -1791.436070 | 2.50         | -1791.427932 |
| 2.10         | -1791.436415 | 2.60         | -1791.436276 | 2.75      | -1791.436690 | 2.55         | -1791.430918 |
| 2.15         | -1791.437082 | 2.65         | -1791.436800 | 2.80      | -1791.436970 | 2.60         | -1791.433205 |
| 2.20         | -1791.437443 | 2.70         | -1791.437025 | 2.85      | -1791.436940 | 2.65         | -1791.434883 |
| 2.30         | -1791.436736 | 2.75         | -1791.436994 | 2.90      | -1791.436660 | 2.70         | -1791.435844 |
| 2.35         | -1791.435316 | 2.80         | -1791.436738 | 2.95      | -1791.436170 | 2.75         | -1791.436551 |
| 2.38         | -1791.432978 | 2.85         | -1791.436307 | 3.00      | -1791.435490 | 2.80         | -1791.436867 |
| 2.40         | -1791.431223 | 2.90         | -1791.435831 | 3.10      | -1791.433720 | 2.90         | -1791.436541 |
| 2.48         | -1791.409296 | 2.95         | -1791.435179 | 3.20      | -1791.431580 | 3.00         | -1791.435236 |
| 2.60         | -1791.413685 | 3.00         | -1791.434636 | 3.30      | -1791.428480 | 3.10         | -1791.433291 |
| 2.70         | -1791.415662 | 3.05         | -1791.433702 | 3.40      | -1791.426960 | 3.20         | -1791.431090 |
| 2.80         | -1791.416297 | 3.10         | -1791.432815 | 3.50      | -1791.425480 | 3.30         | -1791.427928 |
| 2.90         | -1791.416269 | 3.15         | -1791.431516 | 3.60      | -1791.424070 | 3.35         | -1791.427129 |
| 2.95         | -1791.415292 | 3.20         | -1791.429937 | 3.80      | -1791.421580 | 3.40         | -1791.426349 |
| 3.00         | -1791.417452 | 3.25         | -1791.424909 | 4.00      | -1791.419407 | 3.50         | -1791.424865 |
| 3.10         | -1791.420559 | 3.30         | -1791.425227 | 4.20      | -1791.417594 | 3.60         | -1791.423501 |
| 3.20         | -1791.422588 | 3.35         | -1791.425459 | 4.40      | -1791.416473 | 3.80         | -1791.421169 |
| 3.35         | -1791.424001 | 3.40         | -1791.425616 | 4.60      | -1791.415830 | 4.00         | -1791.419282 |
| 3.40         | -1791.424090 | 3.45         | -1791.425711 | 4.80      | -1791.415056 | 4.20         | -1791.417768 |
| 3.50         | -1791.424390 | 3.50         | -1791.425756 | 5.00      | -1791.414546 | 4.40         | -1791.416583 |
| 3.60         | -1791.424680 | 3.55         | -1791.425759 | 5.50      | -1791.413800 | 4.60         | -1791.415674 |
| 3.70         | -1791.424554 | 3.60         | -1791.425728 | 6.00      | -1791.413363 | 4.80         | -1791.414983 |
| 3.80         | -1791.424336 | 3.70         | -1791.425592 | 7.00      | -1791.412981 | 4.90         | -1791.414703 |
| 4.00         | -1791.423781 | 3.80         | -1791.425392 | 8.00      | -1791.412807 | 5.00         | -1791.414458 |
| 4.20         | -1791.423207 | 4.00         | -1791.424886 | 10.00     | -1791.412733 | 5.50         | -1791.413625 |
| 4.50         | -1791.422470 | 4.10         | -1791.424619 |           |              | 6.00         | -1791.413187 |
| 5.00         | -1791.421625 | 4.20         | -1791.424361 |           |              | 7.00         | -1791.412796 |
| 5.50         | -1791.421111 | 4.30         | -1791.424177 |           |              | 7.50         | -1791.412714 |
| 6.00         | -1791.420790 | 4.50         | -1791.423724 |           |              | 8.00         | -1791.412664 |
| 7.00         | -1791.420460 | 4.70         | -1791.423360 |           |              | 10.00        | -1791.412593 |
| 8.00         | -1791.420327 | 4.80         | -1791.423201 |           |              |              |              |
| 10.00        | -1791.420327 | 5.00         | -1791.422925 |           |              |              |              |
|              |              | 5.50         | -1791.422371 |           |              |              |              |
|              |              | 6.00         | -1791.422054 |           |              |              |              |
|              |              | 6.50         | -1791.421853 |           |              |              |              |
|              |              | 7.00         | -1791.421768 |           |              |              |              |
|              |              | 8.00         | -1791.421639 |           |              |              |              |
|              |              | 10.00        | -1791.421573 |           |              |              |              |

| $24^4\Phi$ |              | $25^8\Sigma^-$ |              | $26^4\Pi$ |              | $27^4\Gamma$ |              |
|------------|--------------|----------------|--------------|-----------|--------------|--------------|--------------|
| 1.70       | -1791.401547 | 2.00           | -1791.372445 | 1.65      | -1791.375317 | 1.75         | -1791.390893 |
| 1.75       | -1791.411750 | 2.10           | -1791.389065 | 1.75      | -1791.400099 | 1.80         | -1791.405242 |
| 1.80       | -1791.418753 | 2.15           | -1791.396160 | 1.80      | -1791.407090 | 1.85         | -1791.419359 |
| 1.85       | -1791.422092 | 2.20           | -1791.401292 | 1.85      | -1791.401452 | 1.90         | -1791.423622 |
| 1.90       | -1791.425284 | 2.25           | -1791.405390 | 1.90      | -1791.408347 | 1.95         | -1791.428714 |
| 1.98       | -1791.428253 | 2.30           | -1791.408942 | 1.95      | -1791.417242 | 2.00         | -1791.431964 |
| 2.00       | -1791.428890 | 2.35           | -1791.414302 | 1.98      | -1791.418976 | 2.05         | -1791.433624 |
| 2.05       | -1791.429813 | 2.40           | -1791.419963 | 2.00      | -1791.421634 | 2.10         | -1791.434768 |
| 2.10       | -1791.430421 | 2.45           | -1791.424482 | 2.05      | -1791.425861 | 2.15         | -1791.435856 |
| 2.15       | -1791.430890 | 2.50           | -1791.428236 | 2.23      | -1791.429299 | 2.20         | -1791.435432 |
| 2.23       | -1791.432259 | 2.55           | -1791.431213 | 2.25      | -1791.429890 | 2.25         | -1791.434577 |
| 2.25       | -1791.432840 | 2.60           | -1791.433492 | 2.30      | -1791.430825 | 2.30         | -1791.432967 |
| 2.30       | -1791.433829 | 2.65           | -1791.435165 | 2.40      | -1791.433062 | 2.35         | -1791.430175 |
| 2.40       | -1791.435294 | 2.70           | -1791.436016 | 2.45      | -1791.434494 | 2.40         | -1791.429512 |
| 2.45       | -1791.435844 | 2.75           | -1791.436715 | 2.50      | -1791.435609 | 2.45         | -1791.431551 |
| 2.50       | -1791.436286 | 2.80           | -1791.436631 | 2.55      | -1791.436228 | 2.50         | -1791.433163 |
| 2.55       | -1791.436580 | 2.90           | -1791.436298 | 2.60      | -1791.436520 | 2.55         | -1791.434395 |
| 2.60       | -1791.436739 | 3.00           | -1791.434998 | 2.70      | -1791.436502 | 2.60         | -1791.435277 |
| 2.70       | -1791.436584 | 3.10           | -1791.433074 | 2.75      | -1791.436224 | 2.65         | -1791.435843 |
| 2.75       | -1791.436250 | 3.20           | -1791.430905 | 2.80      | -1791.435780 | 2.70         | -1791.436125 |
| 2.80       | -1791.435743 | 3.30           | -1791.427547 | 2.85      | -1791.435170 | 2.75         | -1791.436149 |
| 2.85       | -1791.435075 | 3.35           | -1791.426773 | 2.91      | -1791.434260 | 2.80         | -1791.435942 |
| 2.91       | -1791.434086 | 3.40           | -1791.426015 | 2.95      | -1791.433560 | 2.85         | -1791.435606 |
| 2.95       | -1791.433332 | 3.50           | -1791.424562 | 3.00      | -1791.432590 | 2.90         | -1791.435032 |
| 3.00       | -1791.432302 | 3.60           | -1791.423219 | 3.06      | -1791.431350 | 2.95         | -1791.434317 |
| 3.06       | -1791.431422 | 3.80           | -1791.420889 | 3.10      | -1791.430408 | 3.00         | -1791.433480 |
| 3.13       | -1791.429898 | 4.00           | -1791.418992 | 3.13      | -1791.429838 | 3.05         | -1791.432540 |
| 3.15       | -1791.429262 | 4.20           | -1791.417510 | 3.15      | -1791.429153 | 3.10         | -1791.431499 |
| 3.18       | -1791.428506 | 4.40           | -1791.416382 | 3.18      | -1791.428396 | 3.15         | -1791.430321 |
| 3.20       | -1791.427782 | 4.60           | -1791.415531 | 3.20      | -1791.427741 | 3.25         | -1791.428344 |
| 3.25       | -1791.427091 | 4.80           | -1791.414892 | 3.25      | -1791.427056 | 3.30         | -1791.427633 |
| 3.30       | -1791.426854 | 4.90           | -1791.414638 | 3.30      | -1791.426824 | 3.35         | -1791.426925 |
| 3.40       | -1791.426258 | 5.00           | -1791.414416 | 3.40      | -1791.426270 | 3.40         | -1791.426215 |
| 3.50       | -1791.426379 | 5.50           | -1791.413652 | 3.50      | -1791.426387 | 3.50         | -1791.426071 |
| 3.60       | -1791.426282 | 6.00           | -1791.413239 | 3.60      | -1791.426288 | 3.55         | -1791.426072 |
| 3.70       | -1791.426062 | 7.00           | -1791.412870 | 3.70      | -1791.426066 | 3.60         | -1791.426033 |
| 3.80       | -1791.425775 | 7.50           | -1791.412789 | 3.80      | -1791.425778 | 3.70         | -1791.425867 |
| 4.00       | -1791.425129 | 8.00           | -1791.412740 | 4.00      | -1791.425130 | 3.80         | -1791.425626 |
| 4.20       | -1791.424504 | 10.00          | -1791.412665 | 4.20      | -1791.424503 | 3.90         | -1791.425348 |
| 4.40       | -1791.423960 |                |              | 4.40      | -1791.423959 | 4.00         | -1791.425056 |
| 4.60       | -1791.423509 |                |              | 4.60      | -1791.423508 | 4.20         | -1791.424488 |
| 4.80       | -1791.423142 |                |              | 4.80      | -1791.423141 | 4.40         | -1791.423987 |
| 5.00       | -1791.422844 |                |              | 5.00      | -1791.422843 | 4.60         | -1791.423567 |
| 5.20       | -1791.422601 |                |              | 5.20      | -1791.422600 | 4.80         | -1791.423221 |
| 5.50       | -1791.422316 |                |              | 5.50      | -1791.422315 | 5.00         | -1791.422889 |
| 6.00       | -1791.421990 |                |              | 6.00      | -1791.421990 | 5.50         | -1791.422379 |
| 6.50       | -1791.421788 |                |              | 6.50      | -1791.421787 | 6.00         | -1791.422057 |
| 7.00       | -1791.421660 |                |              | 7.00      | -1791.421660 | 6.50         | -1791.421898 |
| 7.50       | -1791.421580 |                |              | 7.50      | -1791.421580 | 7.00         | -1791.421728 |
| 8.00       | -1791.421529 |                |              | 8.00      | -1791.421530 | 8.00         | -1791.421600 |
| 10.00      | -1791.421450 |                |              | 10.00     | -1791.421450 | 10.00        | -1791.421572 |
| 8.00       | -1791.421528 |                |              |           |              |              |              |
| 10.00      | -1791.421449 |                |              |           |              |              |              |

| $28^8\Phi$ |              | $29^4\Sigma^+$ |              | $30^2\Phi$ |              | $31^8\Delta$ |              |
|------------|--------------|----------------|--------------|------------|--------------|--------------|--------------|
| 2.10       | -1791.393815 | 1.50           | -1791.230330 | 1.70       | -1791.393805 | 2.00         | -1791.371152 |
| 2.20       | -1791.404639 | 1.55           | -1791.282110 | 1.75       | -1791.408212 | 2.10         | -1791.389694 |
| 2.30       | -1791.413846 | 1.60           | -1791.320670 | 1.80       | -1791.418546 | 2.15         | -1791.397642 |
| 2.40       | -1791.419250 | 1.65           | -1791.346290 | 1.85       | -1791.425750 | 2.20         | -1791.403685 |
| 2.45       | -1791.422300 | 1.70           | -1791.381160 | 1.90       | -1791.430566 | 2.25         | -1791.408914 |
| 2.50       | -1791.426130 | 1.75           | -1791.397810 | 1.95       | -1791.433577 | 2.30         | -1791.413554 |
| 2.55       | -1791.429120 | 1.80           | -1791.410150 | 2.00       | -1791.435234 | 2.35         | -1791.416871 |
| 2.60       | -1791.431440 | 1.85           | -1791.419290 | 2.05       | -1791.435889 | 2.40         | -1791.419224 |
| 2.65       | -1791.433260 | 1.90           | -1791.424130 | 2.10       | -1791.435672 | 2.45         | -1791.419744 |
| 2.70       | -1791.434570 | 1.95           | -1791.428940 | 2.15       | -1791.435041 | 2.50         | -1791.422719 |
| 2.75       | -1791.435440 | 2.00           | -1791.432050 | 2.20       | -1791.434090 | 2.55         | -1791.425978 |
| 2.80       | -1791.435920 | 2.05           | -1791.433650 | 2.25       | -1791.432901 | 2.60         | -1791.428577 |
| 2.85       | -1791.436060 | 2.10           | -1791.434740 | 2.30       | -1791.430733 | 2.65         | -1791.430591 |
| 2.90       | -1791.435920 | 2.15           | -1791.435760 | 2.35       | -1791.429642 | 2.70         | -1791.432429 |
| 2.95       | -1791.435540 | 2.20           | -1791.435120 | 2.40       | -1791.430046 | 2.75         | -1791.433485 |
| 3.00       | -1791.434950 | 2.25           | -1791.434250 | 2.45       | -1791.431673 | 2.80         | -1791.434148 |
| 3.10       | -1791.433290 | 2.30           | -1791.432670 | 2.50       | -1791.432917 | 2.90         | -1791.434503 |
| 3.20       | -1791.431220 | 2.35           | -1791.429870 | 2.55       | -1791.433748 | 3.00         | -1791.433818 |
| 3.30       | -1791.428150 | 2.40           | -1791.431650 | 2.60       | -1791.434358 | 3.10         | -1791.432395 |
| 3.40       | -1791.426650 | 2.45           | -1791.432450 | 2.70       | -1791.433998 | 3.20         | -1791.430632 |
| 3.50       | -1791.425190 | 2.50           | -1791.433340 | 2.75       | -1791.433500 | 3.30         | -1791.428176 |
| 3.60       | -1791.423800 | 2.55           | -1791.434440 | 2.80       | -1791.432858 | 3.35         | -1791.427444 |
| 3.80       | -1791.421330 | 2.60           | -1791.435110 | 2.85       | -1791.432097 | 3.40         | -1791.426708 |
| 4.00       | -1791.419480 | 2.65           | -1791.435680 | 2.90       | -1791.431231 | 3.50         | -1791.425249 |
| 4.20       | -1791.417900 | 2.70           | -1791.435980 | 2.95       | -1791.430284 | 3.60         | -1791.423846 |
| 4.40       | -1791.416700 | 2.75           | -1791.436020 | 3.00       | -1791.429270 | 3.80         | -1791.421318 |
| 4.60       | -1791.415790 | 2.80           | -1791.435840 | 3.05       | -1791.428201 | 4.00         | -1791.419240 |
| 4.80       | -1791.415100 | 2.85           | -1791.435460 | 3.07       | -1791.427746 | 4.20         | -1791.417607 |
| 5.00       | -1791.414570 | 2.90           | -1791.434900 | 3.09       | -1791.427219 | 4.40         | -1791.416362 |
| 5.50       | -1791.413730 | 2.95           | -1791.434200 | 3.20       | -1791.423037 | 4.60         | -1791.415520 |
| 6.00       | -1791.413288 | 3.00           | -1791.433370 | 3.30       | -1791.423560 | 4.80         | -1791.414890 |
| 7.00       | -1791.412906 | 3.05           | -1791.432440 | 3.40       | -1791.423857 | 4.90         | -1791.414640 |
| 8.00       | -1791.412778 | 3.10           | -1791.431410 | 3.50       | -1791.424013 | 5.00         | -1791.414410 |
| 10.00      | -1791.412705 | 3.15           | -1791.430240 | 3.60       | -1791.424027 | 5.50         | -1791.413652 |
|            |              | 3.25           | -1791.428344 | 3.70       | -1791.424053 | 6.00         | -1791.413239 |
|            |              | 3.30           | -1791.427633 | 3.80       | -1791.423987 | 7.00         | -1791.412869 |
|            |              | 3.35           | -1791.426925 | 4.00       | -1791.423777 | 7.50         | -1791.412789 |
|            |              | 3.40           | -1791.426215 | 4.20       | -1791.423591 | 8.00         | -1791.412740 |
|            |              | 3.50           | -1791.425990 | 4.40       | -1791.423346 | 10.00        | -1791.412671 |
|            |              | 3.55           | -1791.425990 | 4.70       | -1791.423008 |              |              |
|            |              | 3.60           | -1791.425950 | 5.00       | -1791.422703 |              |              |
|            |              | 3.70           | -1791.425790 | 5.50       | -1791.422300 |              |              |
|            |              | 3.80           | -1791.425550 | 6.00       | -1791.422018 |              |              |
|            |              | 3.90           | -1791.425280 | 6.50       | -1791.421831 |              |              |
|            |              | 4.00           | -1791.424990 | 7.00       | -1791.421710 |              |              |
|            |              | 4.20           | -1791.424430 | 8.00       | -1791.421584 |              |              |
|            |              | 4.40           | -1791.423930 | 10.00      | -1791.421507 |              |              |
|            |              | 4.60           | -1791.423510 |            |              |              |              |
|            |              | 4.80           | -1791.423170 |            |              |              |              |
|            |              | 5.00           | -1791.422940 |            |              |              |              |
|            |              | 5.50           | -1791.422430 |            |              |              |              |
|            |              | 6.00           | -1791.422100 |            |              |              |              |
|            |              | 6.50           | -1791.421900 |            |              |              |              |
|            |              | 7.00           | -1791.421770 |            |              |              |              |
|            |              | 8.00           | -1791.421640 |            |              |              |              |
|            |              | 10.00          | -1791.421570 |            |              |              |              |

| <b>32<sup>6</sup>Δ</b> |              | <b>33<sup>2</sup>Π</b> |              | <b>34<sup>4</sup>Π</b> |              | <b>35<sup>4</sup>H</b> |              |
|------------------------|--------------|------------------------|--------------|------------------------|--------------|------------------------|--------------|
| 2.10                   | -1791.403761 | 1.70                   | -1791.382326 | 1.65                   | -1791.356350 | 2.20                   | -1791.415590 |
| 2.15                   | -1791.410793 | 1.75                   | -1791.396223 | 1.70                   | -1791.374030 | 2.23                   | -1791.417917 |
| 2.20                   | -1791.416551 | 1.80                   | -1791.406480 | 1.75                   | -1791.386430 | 2.25                   | -1791.419770 |
| 2.25                   | -1791.421335 | 1.85                   | -1791.413786 | 1.80                   | -1791.395150 | 2.30                   | -1791.422947 |
| 2.30                   | -1791.425168 | 1.90                   | -1791.418785 | 1.85                   | -1791.398110 | 2.40                   | -1791.427600 |
| 2.35                   | -1791.426665 | 1.95                   | -1791.422018 | 1.90                   | -1791.406545 | 2.45                   | -1791.429200 |
| 2.40                   | -1791.428777 | 2.00                   | -1791.423966 | 1.95                   | -1791.415529 | 2.50                   | -1791.430400 |
| 2.45                   | -1791.430272 | 2.05                   | -1791.425241 | 1.98                   | -1791.414384 | 2.55                   | -1791.431220 |
| 2.50                   | -1791.431316 | 2.10                   | -1791.426296 | 2.00                   | -1791.416759 | 2.60                   | -1791.431710 |
| 2.55                   | -1791.432226 | 2.15                   | -1791.427581 | 2.05                   | -1791.420935 | 2.70                   | -1791.431770 |
| 2.60                   | -1791.433167 | 2.20                   | -1791.428325 | 2.10                   | -1791.424212 | 2.75                   | -1791.431440 |
| 2.65                   | -1791.433807 | 2.25                   | -1791.428449 | 2.15                   | -1791.426650 | 2.80                   | -1791.430910 |
| 2.70                   | -1791.434207 | 2.30                   | -1791.427400 | 2.20                   | -1791.428708 | 2.85                   | -1791.430210 |
| 2.75                   | -1791.434333 | 2.35                   | -1791.426929 | 2.40                   | -1791.431020 | 2.91                   | -1791.429200 |
| 2.80                   | -1791.434220 | 2.40                   | -1791.429771 | 2.45                   | -1791.431420 | 2.95                   | -1791.428450 |
| 2.85                   | -1791.433903 | 2.45                   | -1791.431472 | 2.50                   | -1791.431640 | 3.00                   | -1791.427460 |
| 2.90                   | -1791.433454 | 2.50                   | -1791.432759 | 2.55                   | -1791.431770 | 3.06                   | -1791.426320 |
| 2.95                   | -1791.432837 | 2.55                   | -1791.433425 | 2.60                   | -1791.431810 | 3.10                   | -1791.425460 |
| 3.00                   | -1791.432070 | 2.60                   | -1791.434064 | 2.70                   | -1791.431473 | 3.13                   | -1791.425040 |
| 3.05                   | -1791.431172 | 2.70                   | -1791.433784 | 2.75                   | -1791.431057 | 3.15                   | -1791.424560 |
| 3.10                   | -1791.430838 | 2.75                   | -1791.433302 | 2.80                   | -1791.430488 |                        |              |
| 3.15                   | -1791.428620 | 2.80                   | -1791.432670 | 2.85                   | -1791.429783 |                        |              |
| 3.20                   | -1791.427549 | 2.85                   | -1791.431915 | 2.91                   | -1791.428795 |                        |              |
| 3.25                   | -1791.424438 | 2.90                   | -1791.431059 | 2.95                   | -1791.428077 |                        |              |
| 3.30                   | -1791.424944 | 2.95                   | -1791.430122 | 3.00                   | -1791.427141 |                        |              |
| 3.35                   | -1791.425319 | 3.00                   | -1791.429116 | 3.06                   | -1791.426048 |                        |              |
| 3.40                   | -1791.425585 | 3.05                   | -1791.428058 | 3.10                   | -1791.425252 |                        |              |
| 3.45                   | -1791.425762 | 3.07                   | -1791.427609 | 3.13                   | -1791.424847 |                        |              |
| 3.50                   | -1791.425866 | 3.09                   | -1791.427086 | 3.15                   | -1791.424405 |                        |              |
| 3.55                   | -1791.425912 | 3.20                   | -1791.422983 | 3.18                   | -1791.423970 |                        |              |
| 3.60                   | -1791.425910 | 3.30                   | -1791.423530 | 3.20                   | -1791.423929 |                        |              |
| 3.70                   | -1791.425799 | 3.40                   | -1791.423841 | 3.25                   | -1791.423646 |                        |              |
| 3.80                   | -1791.425595 | 3.50                   | -1791.424004 | 3.30                   | -1791.424404 |                        |              |
| 4.00                   | -1791.425054 | 3.60                   | -1791.424027 | 3.40                   | -1791.425106 |                        |              |
| 4.10                   | -1791.424766 | 3.70                   | -1791.424053 | 3.50                   | -1791.425403 |                        |              |
| 4.20                   | -1791.424486 | 3.80                   | -1791.423987 | 3.60                   | -1791.425467 |                        |              |
| 4.30                   | -1791.424221 | 4.00                   | -1791.423777 | 3.70                   | -1791.425388 |                        |              |
| 4.50                   | -1791.423745 | 4.20                   | -1791.423586 | 3.80                   | -1791.425220 |                        |              |
| 4.70                   | -1791.423352 | 4.40                   | -1791.423329 | 4.00                   | -1791.424753 |                        |              |
| 4.80                   | -1791.423183 | 4.70                   | -1791.423007 | 4.20                   | -1791.424248 |                        |              |
| 5.00                   | -1791.422893 | 5.00                   | -1791.422703 | 4.40                   | -1791.423785 |                        |              |
| 5.50                   | -1791.422371 | 5.50                   | -1791.422300 | 4.60                   | -1791.423389 |                        |              |
| 6.00                   | -1791.422051 | 6.00                   | -1791.422017 | 4.80                   | -1791.423059 |                        |              |
| 6.50                   | -1791.421852 | 6.50                   | -1791.421830 | 5.00                   | -1791.422787 |                        |              |
| 7.00                   | -1791.421728 | 7.00                   | -1791.421710 | 5.20                   | -1791.422561 |                        |              |
| 8.00                   | -1791.421605 | 8.00                   | -1791.421583 | 5.50                   | -1791.422293 |                        |              |
| 10.00                  | -1791.421535 | 10.00                  | -1791.421507 | 6.00                   | -1791.421981 |                        |              |
|                        |              |                        |              | 6.50                   | -1791.421784 |                        |              |
|                        |              |                        |              | 7.00                   | -1791.421659 |                        |              |
|                        |              |                        |              | 7.50                   | -1791.421581 |                        |              |
|                        |              |                        |              | 8.00                   | -1791.421530 |                        |              |

| $36^4\text{H}$ |              | $37^4\Gamma$ |              | $38^6\Delta$ |              | $39^2\Sigma^-$ |              |
|----------------|--------------|--------------|--------------|--------------|--------------|----------------|--------------|
| 2.20           | -1791.415590 | 2.35         | -1791.425856 | 2.10         | -1791.402614 | 1.60           | -1791.405255 |
| 2.23           | -1791.417917 | 2.40         | -1791.425680 | 2.15         | -1791.409666 | 1.65           | -1791.424578 |
| 2.25           | -1791.419770 | 2.45         | -1791.427681 | 2.20         | -1791.415469 | 1.70           | -1791.437229 |
| 2.30           | -1791.422947 | 2.50         | -1791.429236 | 2.25         | -1791.420236 | 1.75           | -1791.445065 |
| 2.40           | -1791.427600 | 2.55         | -1791.430386 | 2.30         | -1791.423903 | 1.80           | -1791.449535 |
| 2.45           | -1791.429200 | 2.60         | -1791.431185 | 2.35         | -1791.423190 | 1.85           | -1791.451027 |
| 2.50           | -1791.430400 | 2.65         | -1791.431655 | 2.40         | -1791.426044 | 1.90           | -1791.451581 |
| 2.55           | -1791.431220 | 2.70         | -1791.431828 | 2.45         | -1791.428409 | 1.95           | -1791.451161 |
| 2.60           | -1791.431710 | 2.75         | -1791.431730 | 2.50         | -1791.430175 | 2.00           | -1791.450743 |
| 2.70           | -1791.431770 | 2.80         | -1791.431396 | 2.55         | -1791.430600 | 2.05           | -1791.449693 |
| 2.75           | -1791.431440 | 2.85         | -1791.430860 | 2.60         | -1791.431170 | 2.10           | -1791.447846 |
| 2.80           | -1791.430910 | 2.90         | -1791.430164 | 2.65         | -1791.431393 | 2.15           | -1791.445822 |
| 2.85           | -1791.430210 | 2.95         | -1791.429348 | 2.70         | -1791.431701 | 2.20           | -1791.443681 |
| 2.91           | -1791.429200 | 3.00         | -1791.428449 | 2.75         | -1791.431746 | 2.30           | -1791.439419 |
| 2.95           | -1791.428450 | 3.05         | -1791.427506 | 2.80         | -1791.431562 | 2.35           | -1791.436934 |
| 3.00           | -1791.427460 | 3.10         | -1791.426563 | 2.85         | -1791.431198 | 2.40           | -1791.425411 |
| 3.06           | -1791.426320 | 3.15         | -1791.425673 | 2.90         | -1791.430774 | 2.50           | -1791.429235 |
| 3.10           | -1791.425460 | 3.20         | -1791.424846 | 2.95         | -1791.430206 | 2.60           | -1791.431158 |
| 3.13           | -1791.425040 | 3.25         | -1791.423878 | 3.00         | -1791.429479 | 2.70           | -1791.431559 |
| 3.15           | -1791.424560 | 3.30         | -1791.424481 | 3.05         | -1791.428613 | 2.80           | -1791.430736 |
|                |              | 3.35         | -1791.424930 | 3.10         | -1791.427501 | 2.90           | -1791.428860 |
|                |              | 3.40         | -1791.425251 | 3.25         | -1791.423331 | 2.95           | -1791.425544 |
|                |              | 3.50         | -1791.425606 | 3.30         | -1791.423930 | 3.00           | -1791.420151 |
|                |              | 3.55         | -1791.425678 | 3.35         | -1791.424397 | 3.10           | -1791.421990 |
|                |              | 3.60         | -1791.425699 | 3.40         | -1791.424751 | 3.20           | -1791.423658 |
|                |              | 3.70         | -1791.425628 | 3.45         | -1791.425011 | 3.30           | -1791.424748 |
|                |              | 3.80         | -1791.425455 | 3.50         | -1791.425194 | 3.40           | -1791.425332 |
|                |              | 3.90         | -1791.425224 | 3.55         | -1791.425312 | 3.50           | -1791.425386 |
|                |              | 4.00         | -1791.424963 | 3.60         | -1791.425376 | 3.60           | -1791.425404 |
|                |              | 4.20         | -1791.424428 | 3.70         | -1791.425379 | 3.70           | -1791.425197 |
|                |              | 4.40         | -1791.423941 | 3.80         | -1791.425263 | 3.80           | -1791.424846 |
|                |              | 4.60         | -1791.423526 | 4.00         | -1791.424853 | 4.00           | -1791.424289 |
|                |              | 4.80         | -1791.423184 | 4.10         | -1791.424614 | 4.30           | -1791.423052 |
|                |              | 5.00         | -1791.422903 | 4.20         | -1791.424372 | 4.50           | -1791.422569 |
|                |              | 5.50         | -1791.422398 | 4.30         | -1791.424138 | 5.00           | -1791.421712 |
|                |              | 6.00         | -1791.422081 | 4.50         | -1791.423700 | 5.50           | -1791.421189 |
|                |              | 6.50         | -1791.421881 | 4.70         | -1791.423340 | 6.00           | -1791.420862 |
|                |              | 7.00         | -1791.421755 | 4.80         | -1791.423190 | 7.00           | -1791.420529 |
|                |              | 8.00         | -1791.421627 | 5.00         | -1791.422910 | 8.00           | -1791.420398 |
|                |              | 10.00        | -1791.421550 | 5.50         | -1791.422386 | 10.00          | -1791.420334 |
|                |              |              |              | 6.00         | -1791.422073 |                |              |
|                |              |              |              | 6.50         | -1791.421874 |                |              |
|                |              |              |              | 7.00         | -1791.421750 |                |              |
|                |              |              |              | 8.00         | -1791.421619 |                |              |
|                |              |              |              | 10.00        | -1791.421542 |                |              |

| $40^4\Pi$ |              | $41^8\Pi$ |              | $42^8\Sigma^+$ |              | $43^8\Gamma$ |              |
|-----------|--------------|-----------|--------------|----------------|--------------|--------------|--------------|
| 1.65      | -1791.345620 | 2.10      | -1791.383643 | 2.00           | -1791.351601 | 2.00         | -1791.335805 |
| 1.70      | -1791.364400 | 2.20      | -1791.395572 | 2.10           | -1791.360925 | 2.10         | -1791.360011 |
| 1.75      | -1791.377750 | 2.30      | -1791.408091 | 2.15           | -1791.358755 | 2.15         | -1791.361839 |
| 1.80      | -1791.387260 | 2.40      | -1791.412516 | 2.20           | -1791.370079 | 2.20         | -1791.368890 |
| 1.85      | -1791.395150 | 2.45      | -1791.414678 | 2.25           | -1791.380432 | 2.25         | -1791.374810 |
| 1.90      | -1791.399080 | 2.50      | -1791.417983 | 2.30           | -1791.389553 | 2.30         | -1791.380290 |
| 1.95      | -1791.411270 | 2.55      | -1791.420800 | 2.35           | -1791.397102 | 2.35         | -1791.388680 |
| 1.98      | -1791.404740 | 2.60      | -1791.423250 | 2.40           | -1791.403520 | 2.40         | -1791.395940 |
| 2.00      | -1791.406500 | 2.65      | -1791.425300 | 2.45           | -1791.408820 | 2.45         | -1791.397640 |
| 2.05      | -1791.410180 | 2.70      | -1791.426860 | 2.50           | -1791.413250 | 2.50         | -1791.403240 |
| 2.10      | -1791.414250 | 2.75      | -1791.428020 | 2.55           | -1791.416790 | 2.55         | -1791.408080 |
| 2.15      | -1791.418310 | 2.80      | -1791.428840 | 2.60           | -1791.419620 | 2.60         | -1791.412210 |
| 2.20      | -1791.421983 | 2.85      | -1791.429370 | 2.65           | -1791.421860 | 2.65         | -1791.415700 |
| 2.23      | -1791.418014 | 2.90      | -1791.429650 | 2.70           | -1791.423710 | 2.70         | -1791.418878 |
| 2.25      | -1791.419720 | 2.95      | -1791.429700 | 2.75           | -1791.425070 | 2.75         | -1791.421250 |
| 2.30      | -1791.422670 | 3.00      | -1791.429550 | 2.80           | -1791.426070 | 2.80         | -1791.423158 |
| 2.35      | -1791.425010 | 3.10      | -1791.428800 | 2.90           | -1791.427240 | 2.90         | -1791.425784 |
| 2.40      | -1791.426830 | 3.20      | -1791.427630 | 3.00           | -1791.427530 | 3.00         | -1791.427073 |
| 2.45      | -1791.428180 | 3.30      | -1791.426110 | 3.10           | -1791.427118 | 3.10         | -1791.427310 |
| 2.50      | -1791.429130 | 3.40      | -1791.425080 | 3.20           | -1791.426351 | 3.20         | -1791.426860 |
| 2.55      | -1791.429710 | 3.50      | -1791.423990 | 3.30           | -1791.424999 | 3.30         | -1791.425670 |
| 2.60      | -1791.429980 | 3.60      | -1791.422900 | 3.35           | -1791.424595 | 3.35         | -1791.425290 |
| 2.70      | -1791.429850 | 3.80      | -1791.420834 | 3.40           | -1791.424159 | 3.40         | -1791.424860 |
| 2.75      | -1791.429500 | 4.00      | -1791.419055 | 3.50           | -1791.423229 | 3.50         | -1791.423880 |
| 2.80      | -1791.428980 | 4.20      | -1791.417445 | 3.60           | -1791.422263 | 3.60         | -1791.422830 |
| 2.85      | -1791.428320 | 4.40      | -1791.416399 | 3.80           | -1791.420389 | 3.80         | -1791.420690 |
| 2.91      | -1791.427370 | 4.60      | -1791.415644 | 4.00           | -1791.418746 | 4.00         | -1791.418830 |
| 2.95      | -1791.426670 | 4.80      | -1791.415001 | 4.20           | -1791.417401 | 4.20         | -1791.417371 |
| 3.00      | -1791.425750 | 5.00      | -1791.414511 | 4.40           | -1791.416342 | 4.40         | -1791.416261 |
| 3.06      | -1791.424740 | 5.50      | -1791.413723 | 4.60           | -1791.415502 | 4.60         | -1791.415426 |
| 3.10      | -1791.423950 | 6.00      | -1791.413300 | 4.80           | -1791.414862 | 4.80         | -1791.414798 |
| 3.13      | -1791.423630 | 7.00      | -1791.412927 | 4.90           | -1791.414603 | 4.90         | -1791.414544 |
| 3.15      | -1791.423263 | 8.00      | -1791.412796 | 5.00           | -1791.414377 | 5.00         | -1791.414322 |
| 3.18      | -1791.422930 | 10.00     | -1791.412726 | 5.50           | -1791.413599 | 5.50         | -1791.413561 |
|           |              |           |              | 6.00           | -1791.413176 | 6.00         | -1791.413151 |
|           |              |           |              | 7.00           | -1791.412808 | 7.00         | -1791.412786 |
|           |              |           |              | 7.50           | -1791.412725 | 7.50         | -1791.412705 |
|           |              |           |              | 8.00           | -1791.412673 | 8.00         | -1791.412654 |
|           |              |           |              | 10.00          | -1791.412595 | 10.00        | -1791.412578 |

**44<sup>8</sup>Δ**

---

|       |              |
|-------|--------------|
| 2.00  | -1791.359001 |
| 2.10  | -1791.378628 |
| 2.15  | -1791.386686 |
| 2.20  | -1791.391254 |
| 2.25  | -1791.394280 |
| 2.30  | -1791.401070 |
| 2.35  | -1791.407820 |
| 2.40  | -1791.413540 |
| 2.45  | -1791.418790 |
| 2.50  | -1791.420660 |
| 2.55  | -1791.421210 |
| 2.60  | -1791.421350 |
| 2.65  | -1791.421170 |
| 2.70  | -1791.421690 |
| 2.75  | -1791.423350 |
| 2.80  | -1791.424600 |
| 2.90  | -1791.426080 |
| 3.00  | -1791.426496 |
| 3.10  | -1791.426203 |
| 3.20  | -1791.425626 |
| 3.30  | -1791.424516 |
| 3.35  | -1791.424212 |
| 3.40  | -1791.423858 |
| 3.50  | -1791.423044 |
| 3.60  | -1791.422152 |
| 3.80  | -1791.420351 |
| 4.00  | -1791.418734 |
| 4.20  | -1791.417390 |
| 4.40  | -1791.416330 |
| 4.60  | -1791.415470 |
| 4.80  | -1791.414870 |
| 4.90  | -1791.414620 |
| 5.00  | -1791.414410 |
| 5.50  | -1791.413620 |
| 6.00  | -1791.413180 |
| 7.00  | -1791.412800 |
| 7.50  | -1791.412710 |
| 8.00  | -1791.412670 |
| 10.00 | -1791.412593 |
